# Supplementary material
Source: publisher figshare collection journal article supplement (https://acs.figshare.com/ndownloader/files/4264111)
Supplement: Supplementary file 1 [file 4264111]

**A high compliance randomised controlled field trial of solar disinfection (SODIS) of drinking water  
and its impact on childhood diarrhoea in rural Cambodia.**

**Kevin G McGuigan<sup>1\*</sup>, Priyajit Samaiyar<sup>2</sup>, Martella du Preez<sup>3</sup>, Ronán M Conroy<sup>4</sup>**

<sup>1</sup>Department of Physiology & Medical Physics ,Royal College of Surgeons in Ireland, 123 St Stephens Green, Dublin 2, Ireland.

<sup>2</sup>CARE International in Cambodia (CIC), P.O. Box 537, House 52 Street 352, Phnom Penh, Cambodia

<sup>3</sup>Natural Resources and the Environment, CSIR, P.O. Box 395, Pretoria, South Africa.

<sup>4</sup>Division of Population Health Sciences, Royal College of Surgeons in Ireland, 123 St Stephens Green, Dublin 2, Ireland.

**Supporting Information**

\*Author for Correspondence:

Phone: +353 (0)1 4022207; E-mail: [kmcguigan@rcsi.ie](mailto:kmcguigan@rcsi.ie)

**Supporting Information Figure Captions**

|                                                                                                                                                                                                                                 | <b>Page</b> |
|---------------------------------------------------------------------------------------------------------------------------------------------------------------------------------------------------------------------------------|-------------|
| <b>Figure 1.</b> Map of Cambodia showing the project areas in Prey Veng (a),<br>Svey Rieng (b) and the capital city Phnom Penh (c).                                                                                             | S3          |
| <b>Figure 2.</b> Photograph of an unprotected borehole fitted with a hand-pump<br>as used by 95% of the study households.                                                                                                       | S4          |
| <b>Figure 3.</b> Photograph of one of the surface pond water sources used by<br>~5% of the study households.                                                                                                                    | S5          |
| <b>Figure 4.</b> Photograph of a 300 litre lidded cement water storage container<br>used by ~70% of the study population.                                                                                                       | S6          |
| <b>Figure 5.</b> Photograph showing the standard arrangement for SODIS<br>exposure at a study household. The bottles and the sheet of<br>corrugated iron platform upon which they are resting, were<br>provided by the project. | S7          |
